# Supplementary material
Source: PubMed Central journal article supplement (PMC5558158)
Supplement: NIHMS886901-supplement.pdf [file NIHMS886901-supplement.pdf]

# **Conformational Heterogeneity in the Activation Mechanism of Bax**

C. Ashley Barnes<sup>1</sup>, Pushpa Mishra<sup>1</sup>, James L. Baber<sup>2</sup>, Marie-Paule Strub<sup>1</sup>, and Nico Tjandra<sup>1\*</sup>

<sup>1</sup>Laboratory of Molecular Biophysics, Biochemistry and Biophysics Center, National Heart, Lung, and Blood Institute, National Institutes of Health, Bethesda, Maryland 20892

<sup>2</sup>Laboratory of Chemical Physics, National Institutes of Diabetes and Digestive and Kidney Diseases, National Institutes of Health, Bethesda, Maryland 20892

## **Supplementary Materials**

\*Lead contact and to whom correspondence should be addressed: Nico Tjandra, Phone: (301)-402-3029; Fax: (301)-402-3405; E-mail address: [tjandra@nhlbi.nih.gov](mailto:tjandra@nhlbi.nih.gov)

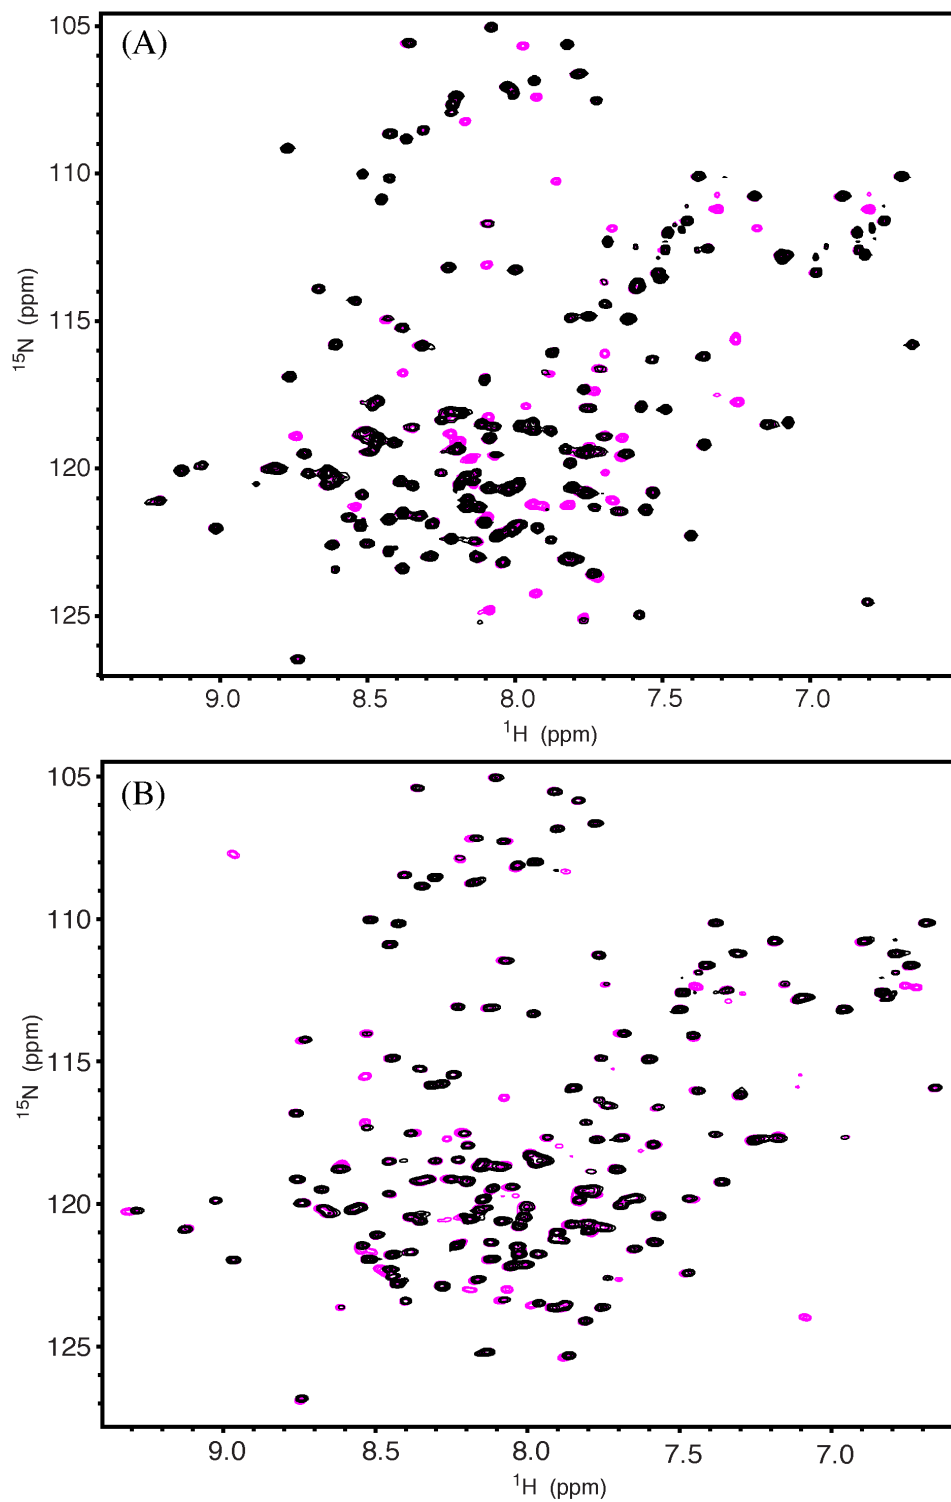

**Figure S1. Related to Figure 1.**

A superposition of  $^1\text{H}$ - $^{15}\text{N}$  HSQC of Bax C62S 126-MTSL and its diamagnetic spectrum (A) as well as Bax C126S 62-MTSL and its diamagnetic spectrum (B). The diamagnetic and paramagnetic spectra are pink and black, respectively.

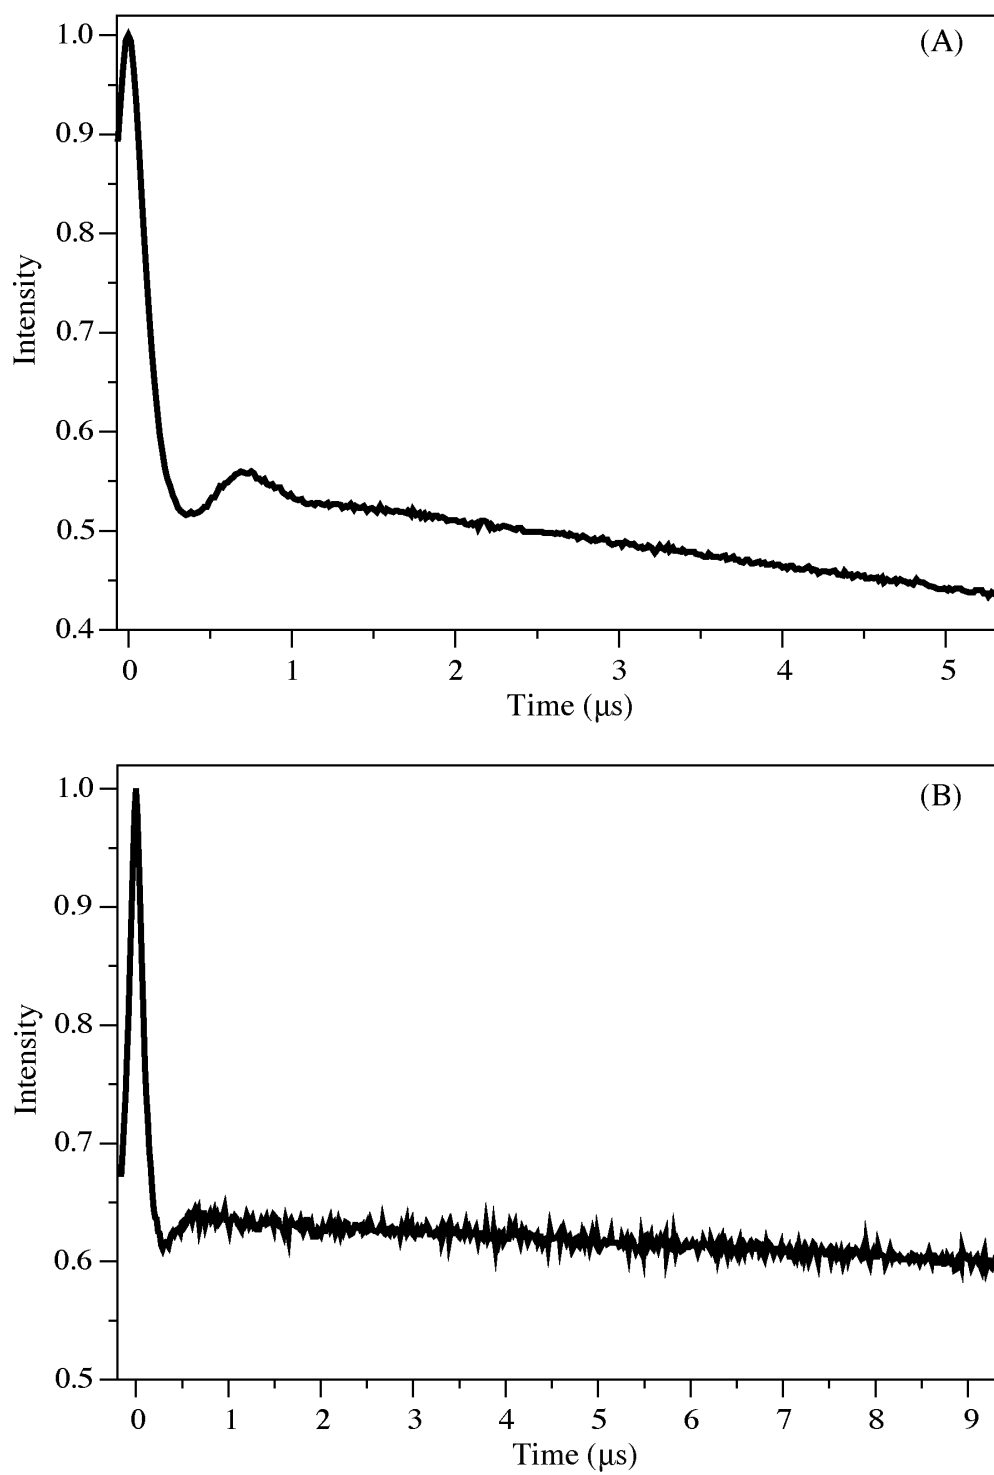

**Figure S2. Related to Figure 4.**

Unprocessed dipolar evolution DEER curves of Bax 62-126MTSL (A) and Bax 126-186MTSL (B).
